# Supplementary material for: Thermodynamic study of the adsorption of acridinium derivatives on the clay surface
Source: Royal Society of Chemistry journal article supplement (doi:10.1039/d0ra03158e), 2020-01-01
Supplement: d0ra03158e1.pdf [file d0ra03158e1.pdf]

[Supporting information]

# Thermodynamic study for Adsorption of Acridinium Derivatives on the Clay Surface

*Yuma Yoshida,<sup>1</sup> Tetsuya Shimada,<sup>1,2</sup> Tamao Ishida,<sup>1,2,3</sup> Shinsuke Takagi<sup>1,2\*</sup>*

<sup>1</sup>Department of Applied Chemistry, Graduate Course of Urban Environmental Sciences, Tokyo

Metropolitan University, Minami-ohsawa 1-1, Hachiohji, Tokyo 192-0397 Japan

<sup>2</sup>Research Center for Hydrogen Energy-based Society (ReHES), Tokyo Metropolitan University, 1-1

Minami-ohsawa 1-1, Hachiohji, Tokyo 192-0397 Japan

<sup>3</sup>Research Center for Gold Chemistry, Tokyo Metropolitan University, Minami-ohsawa 1-1,

Hachiohji, Tokyo 192-0397 Japan

[takagi-shinsuke@tmu.ac.jp](mailto:takagi-shinsuke@tmu.ac.jp)

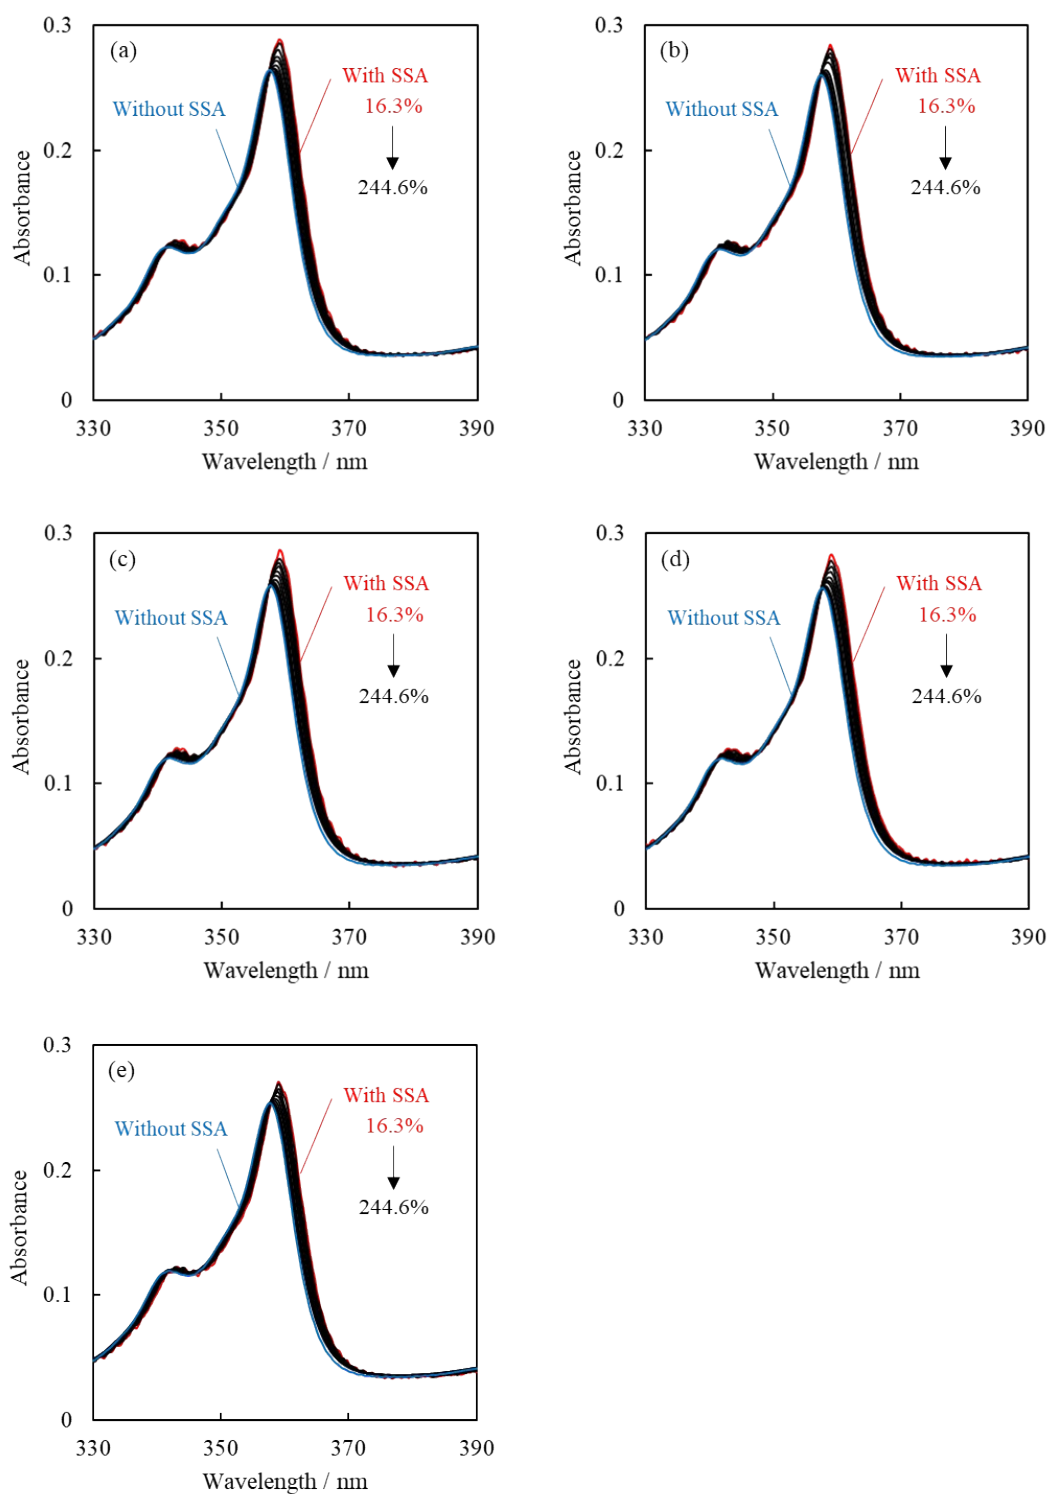

**Figure S1.** UV-vis adsorption spectra of compound 1 (perchlorate) with SSA and without SSA in water. The loading levels of compound 1 were 16.3, 24.5, 32.6, 40.8, 48.9, 65.2, 81.5, 122.3, 163.0, 244.6% vs. CEC: (a)273.15 K, (b)278.15 K, (c)283.15 K, (d)288.15 K, (e)293.15 K.

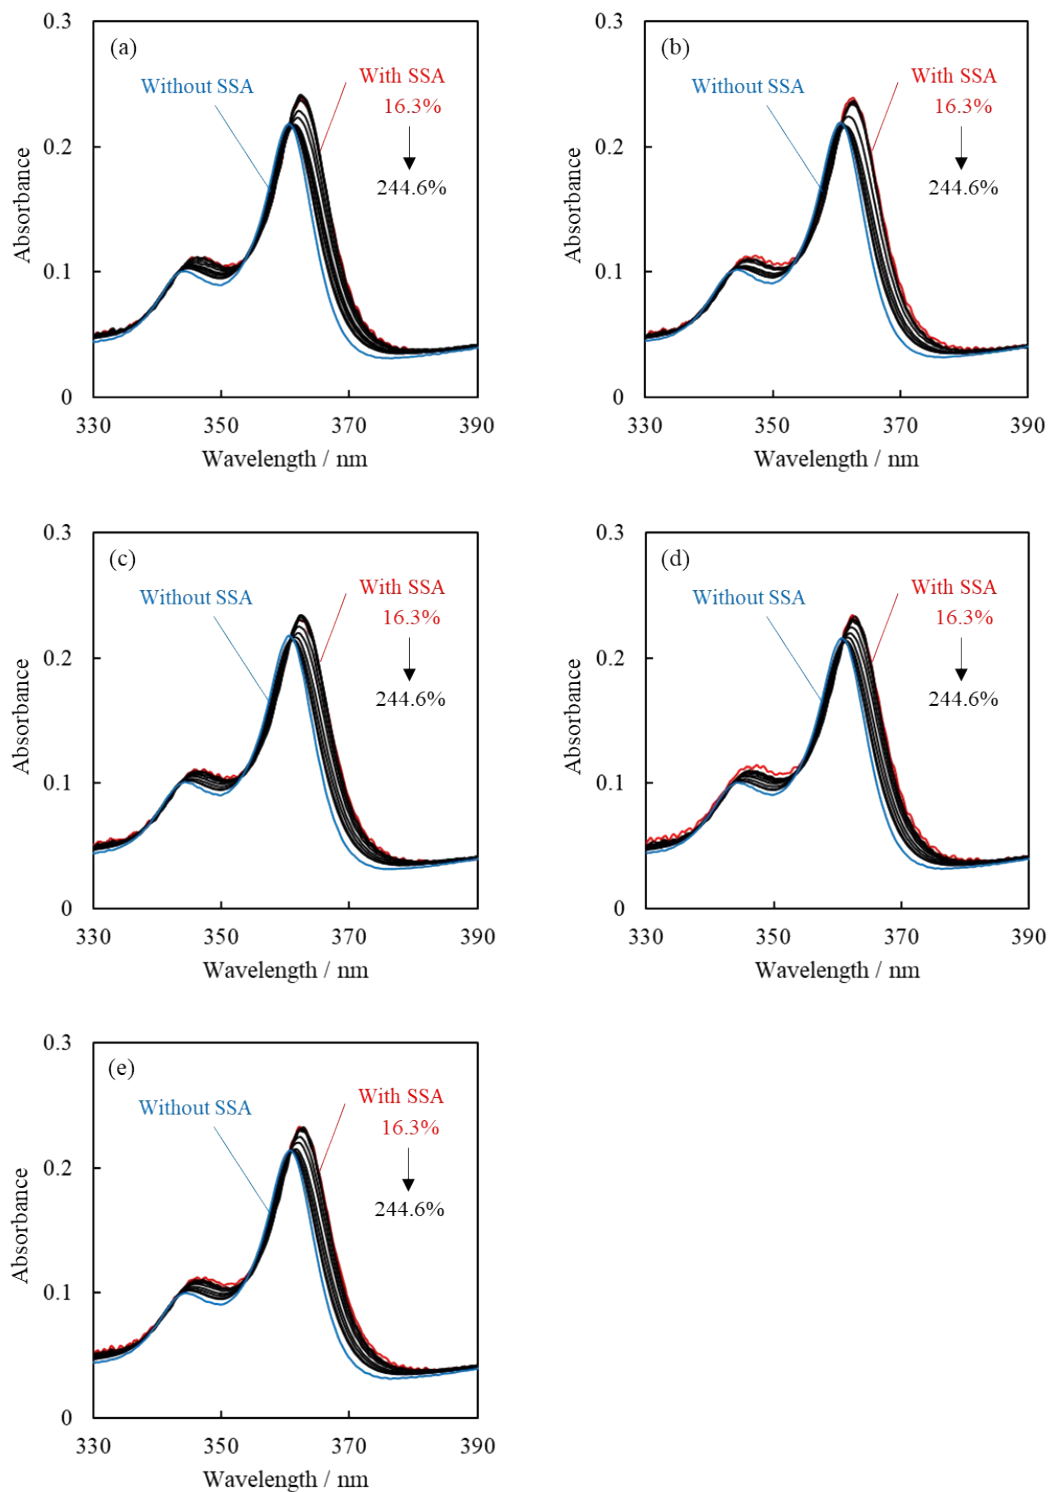

**Figure S2.** UV-vis adsorption spectra of compound **2** (perchlorate) with SSA and without SSA in water. The loading levels of compound **2** were 16.3, 24.5, 32.6, 40.8, 48.9, 65.2, 81.5, 122.3, 163.0, 244.6% vs. CEC: (a)273.15 K, (b)278.15 K, (c)283.15 K, (d)288.15 K, (e)293.15 K.

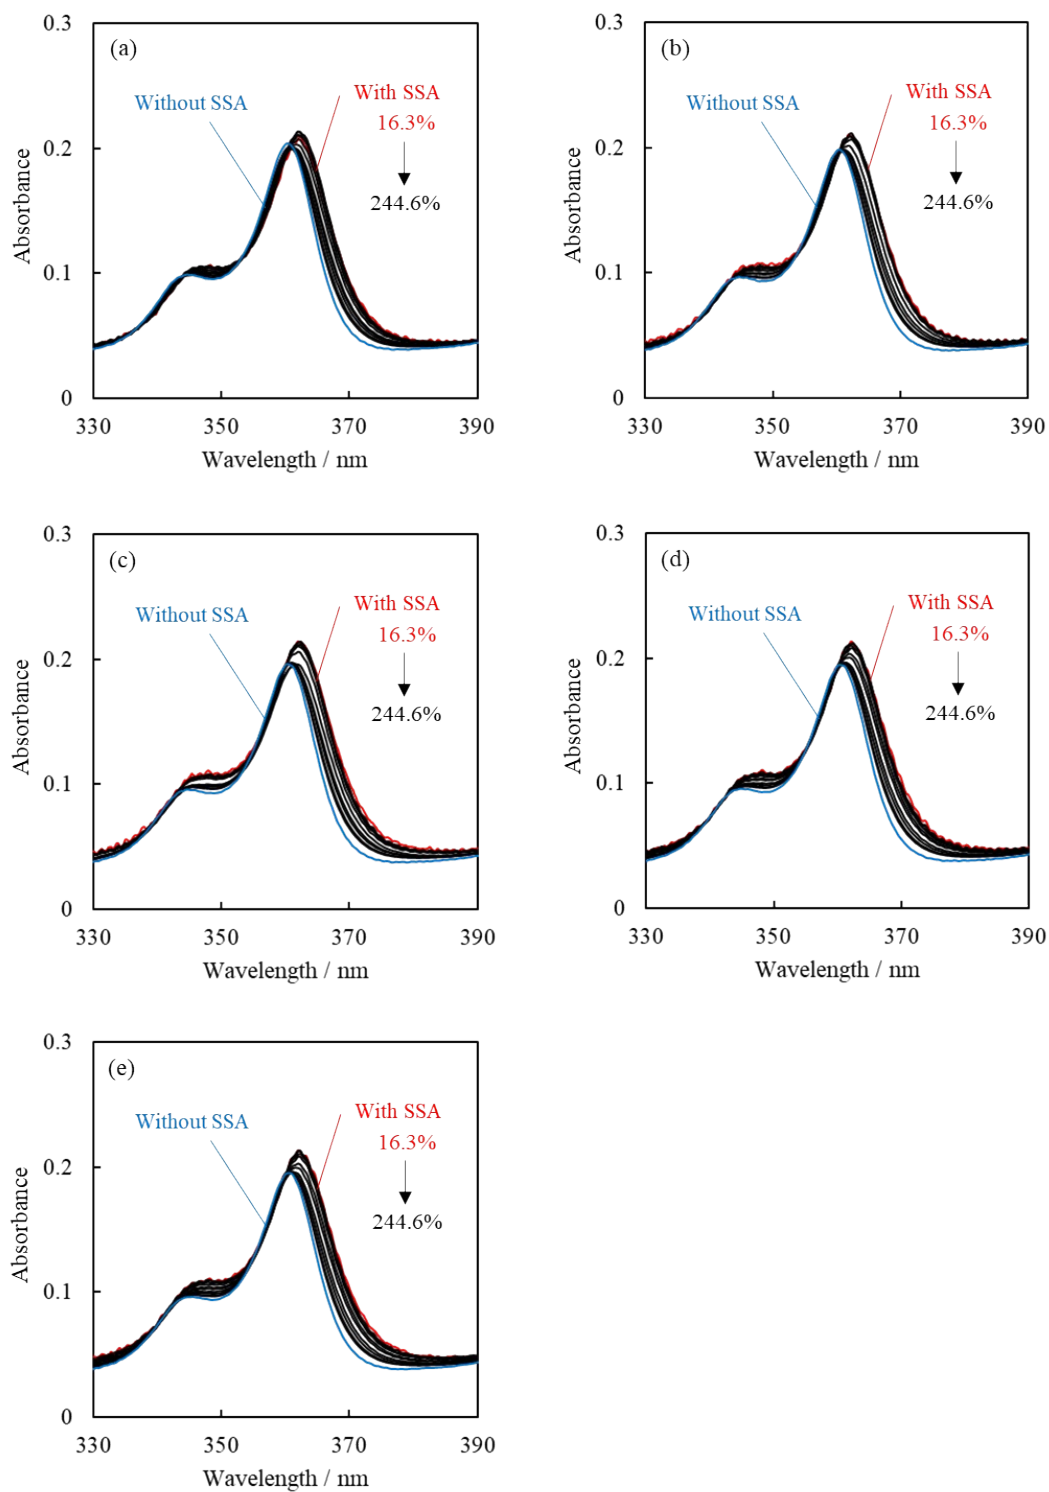

**Figure S3.** UV-vis adsorption spectra of compound **3** (perchlorate) with SSA and without SSA in water. The loading levels of compound **3** were 16.3, 24.5, 32.6, 40.8, 48.9, 65.2, 81.5, 122.3, 163.0, 244.6% vs. CEC: (a)273.15 K, (b)278.15 K, (c)283.15 K, (d)288.15 K, (e)293.15 K.

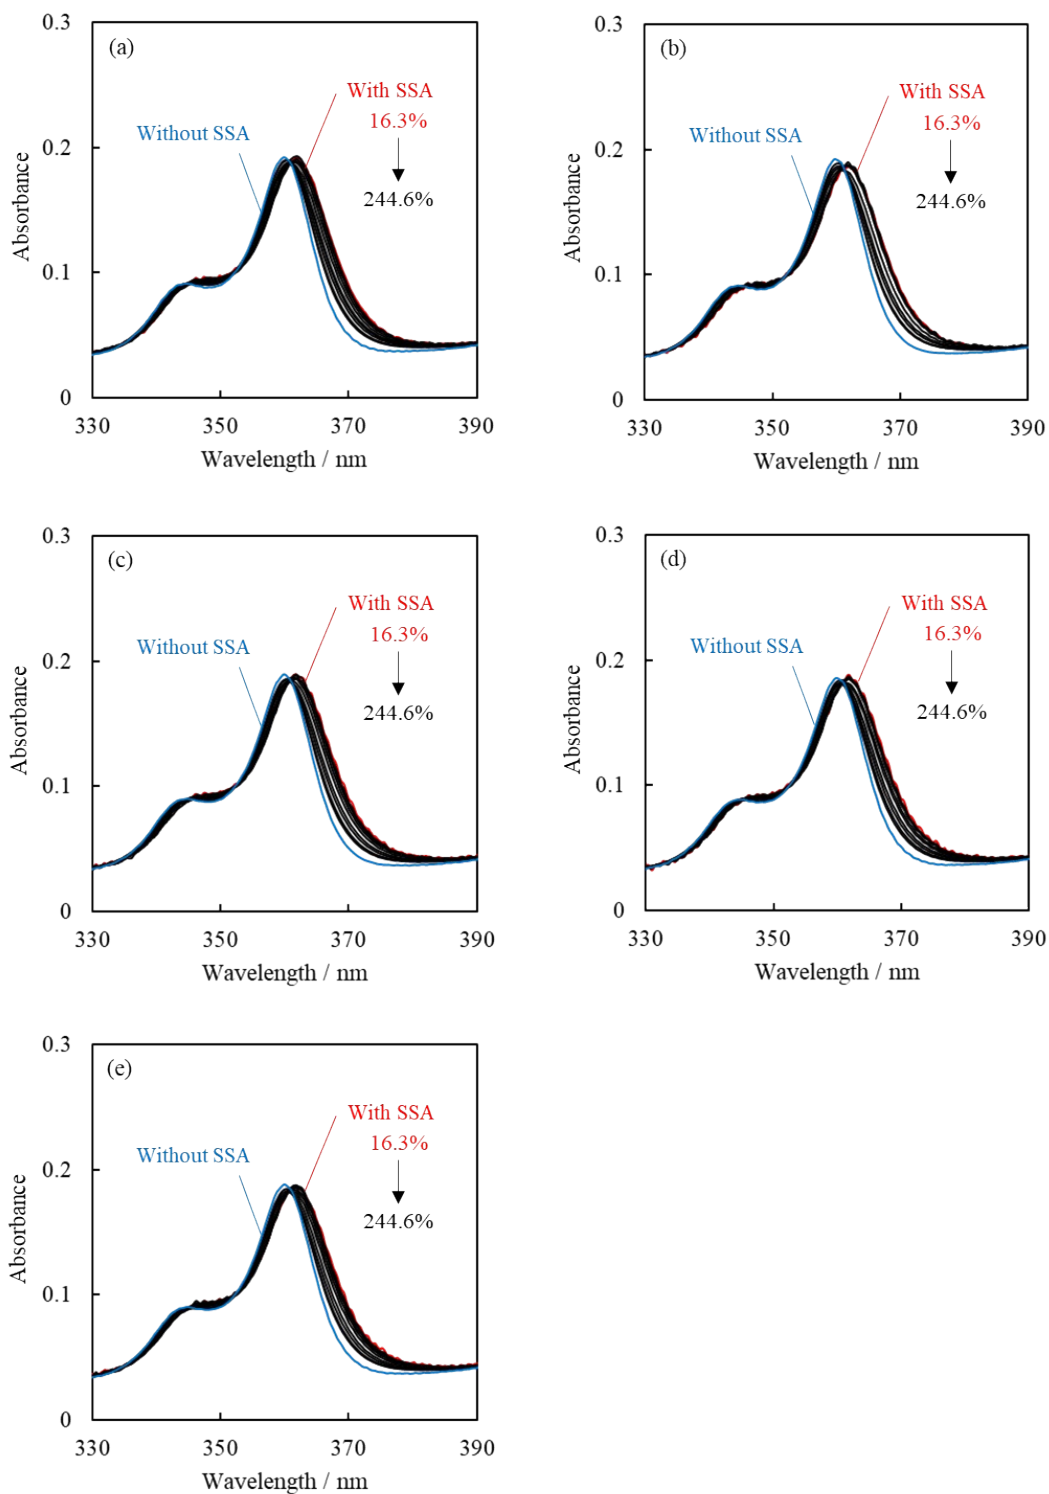

**Figure S4.** UV-vis adsorption spectra of compound **4** (perchlorate) with SSA and without SSA in water. The loading levels of compound **4** were 16.3, 24.5, 32.6, 40.8, 48.9, 65.2, 81.5, 122.3, 163.0, 244.6% vs. CEC: (a)273.15 K, (b)278.15 K, (c)283.15 K, (d)288.15 K, (e)293.15 K.

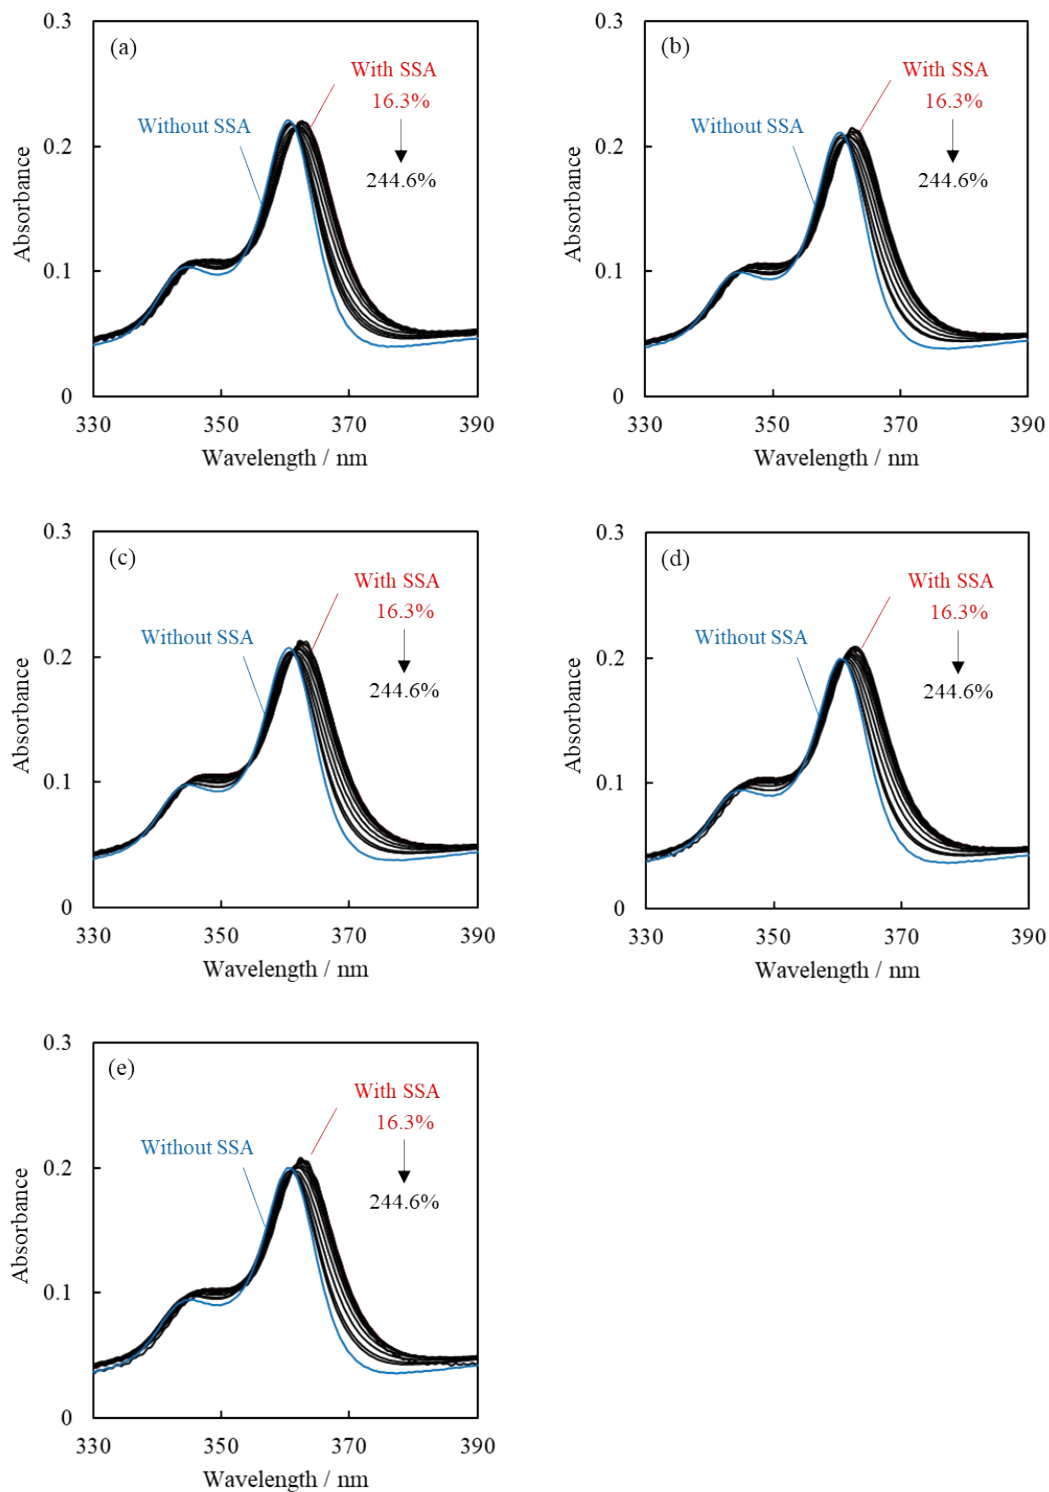

**Figure S5.** UV-vis adsorption spectra of compound **5** (perchlorate) with SSA and without SSA in water. The loading levels of compound **5** were 16.3, 24.5, 48.9, 57.1, 65.2, 73.4, 81.5, 97.8, 122.3, 163.0, 244.6% vs. CEC: (a)273.15 K, (b)278.15 K, (c)283.15 K, (d)288.15 K, (e)293.15 K.

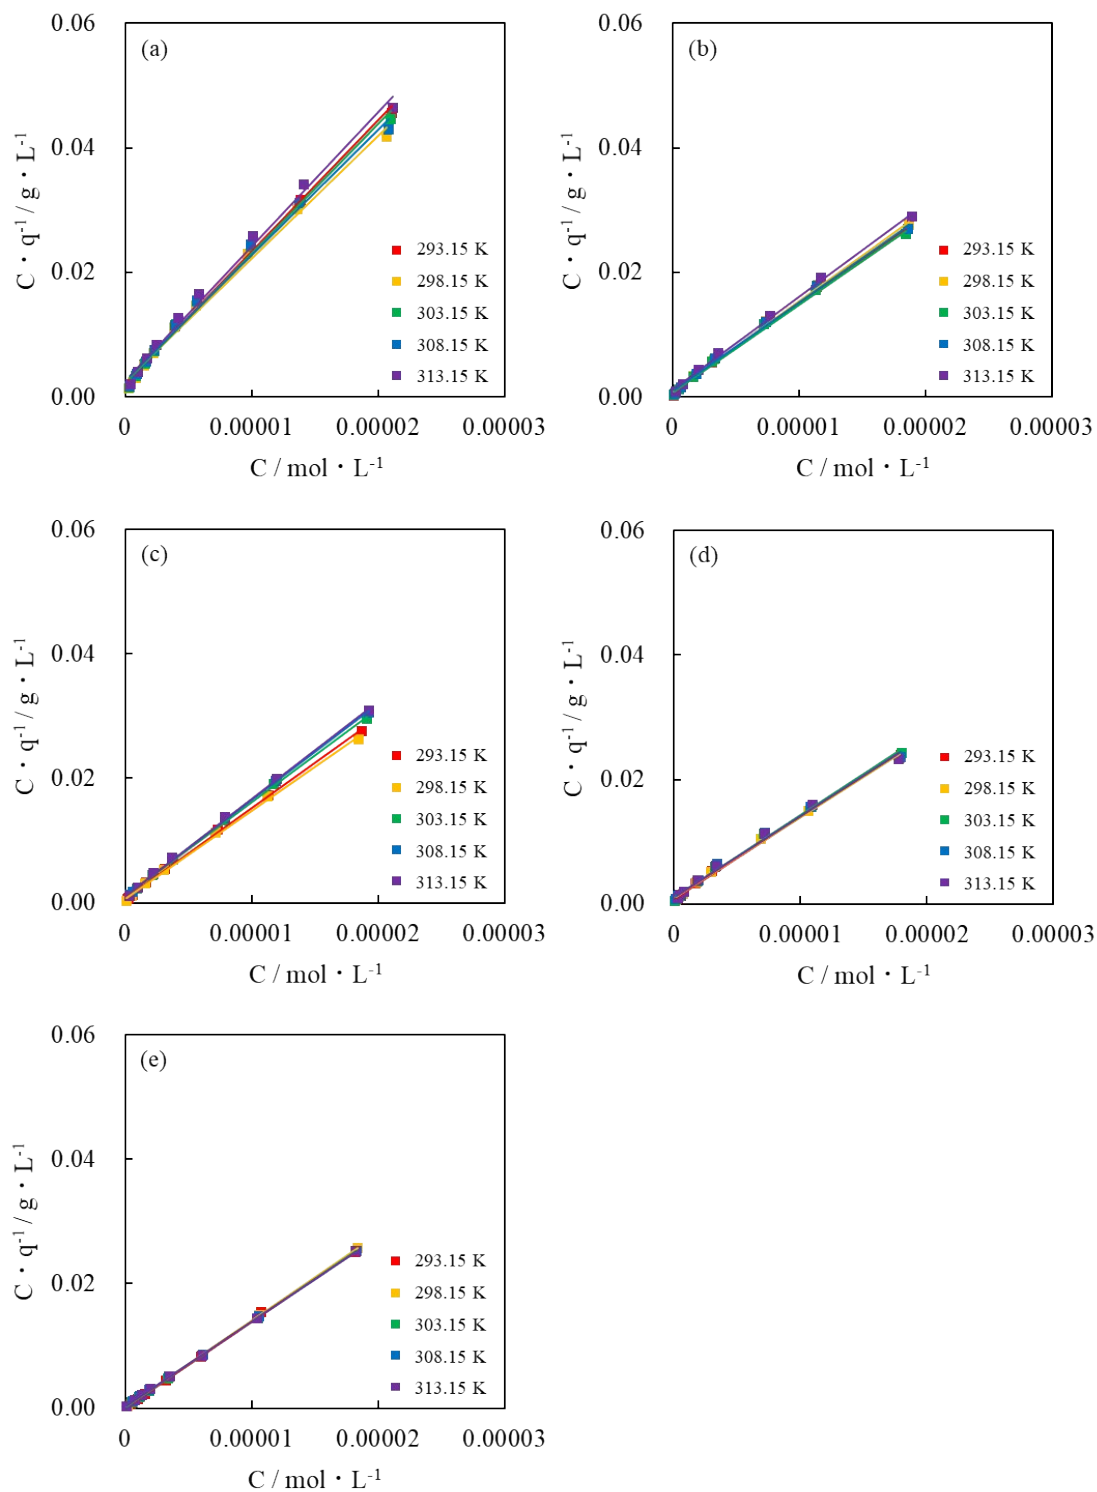

**Figure S6.** Langmuir isotherm analysis for the adsorption of acridinium derivatives (perchlorate) on SSA at each temperature: (a) compound **1**, (b) compound **2**, (c) compound **3**, (d) compound **4**, (e) compound **5**.

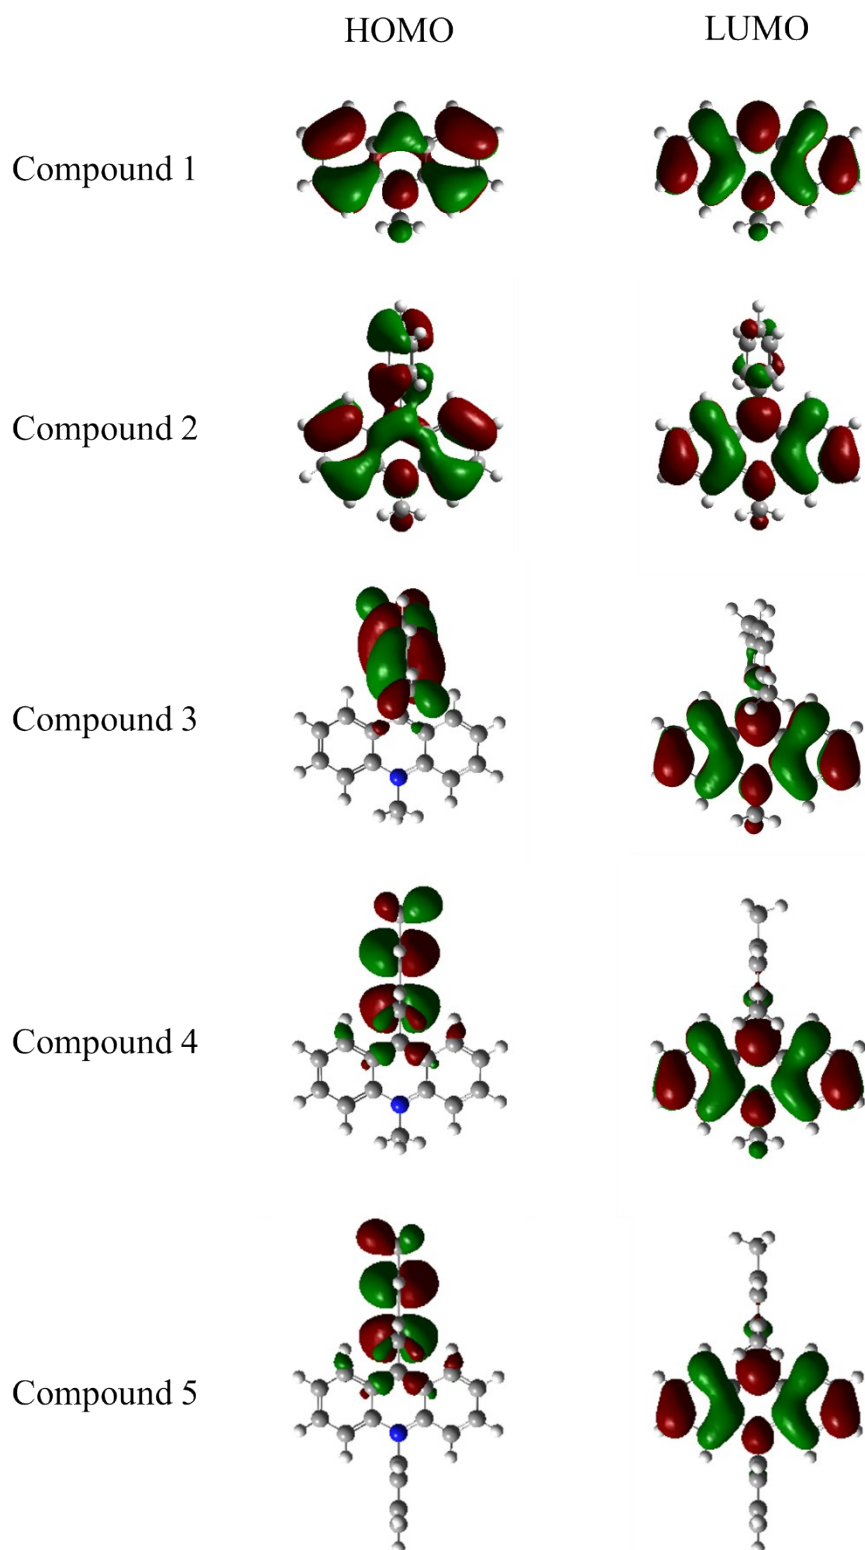

**Figure S7.** Optimized molecular structure of acridinium derivatives (compound 1–5) obtained from DFT calculations performed at B3LYP/6-31G\* level using Gaussian09 package.



**Table S1.** Estimated energy levels of HOMO and LUMO for acridinium derivatives (compound 1–5) and chemical hardness

| Compound | $\varepsilon_{\text{HOMO}} / \text{eV}$ | $\varepsilon_{\text{LUMO}} / \text{eV}$ | $\eta / \text{eV}$ |
|----------|-----------------------------------------|-----------------------------------------|--------------------|
| 1        | -10.119                                 | -6.671                                  | 1.724              |
| 2        | -9.678                                  | -6.359                                  | 1.659              |
| 3        | -9.201                                  | -6.311                                  | 1.445              |
| 4        | -9.095                                  | -6.110                                  | 1.493              |
| 5        | -9.196                                  | -6.322                                  | 1.437              |

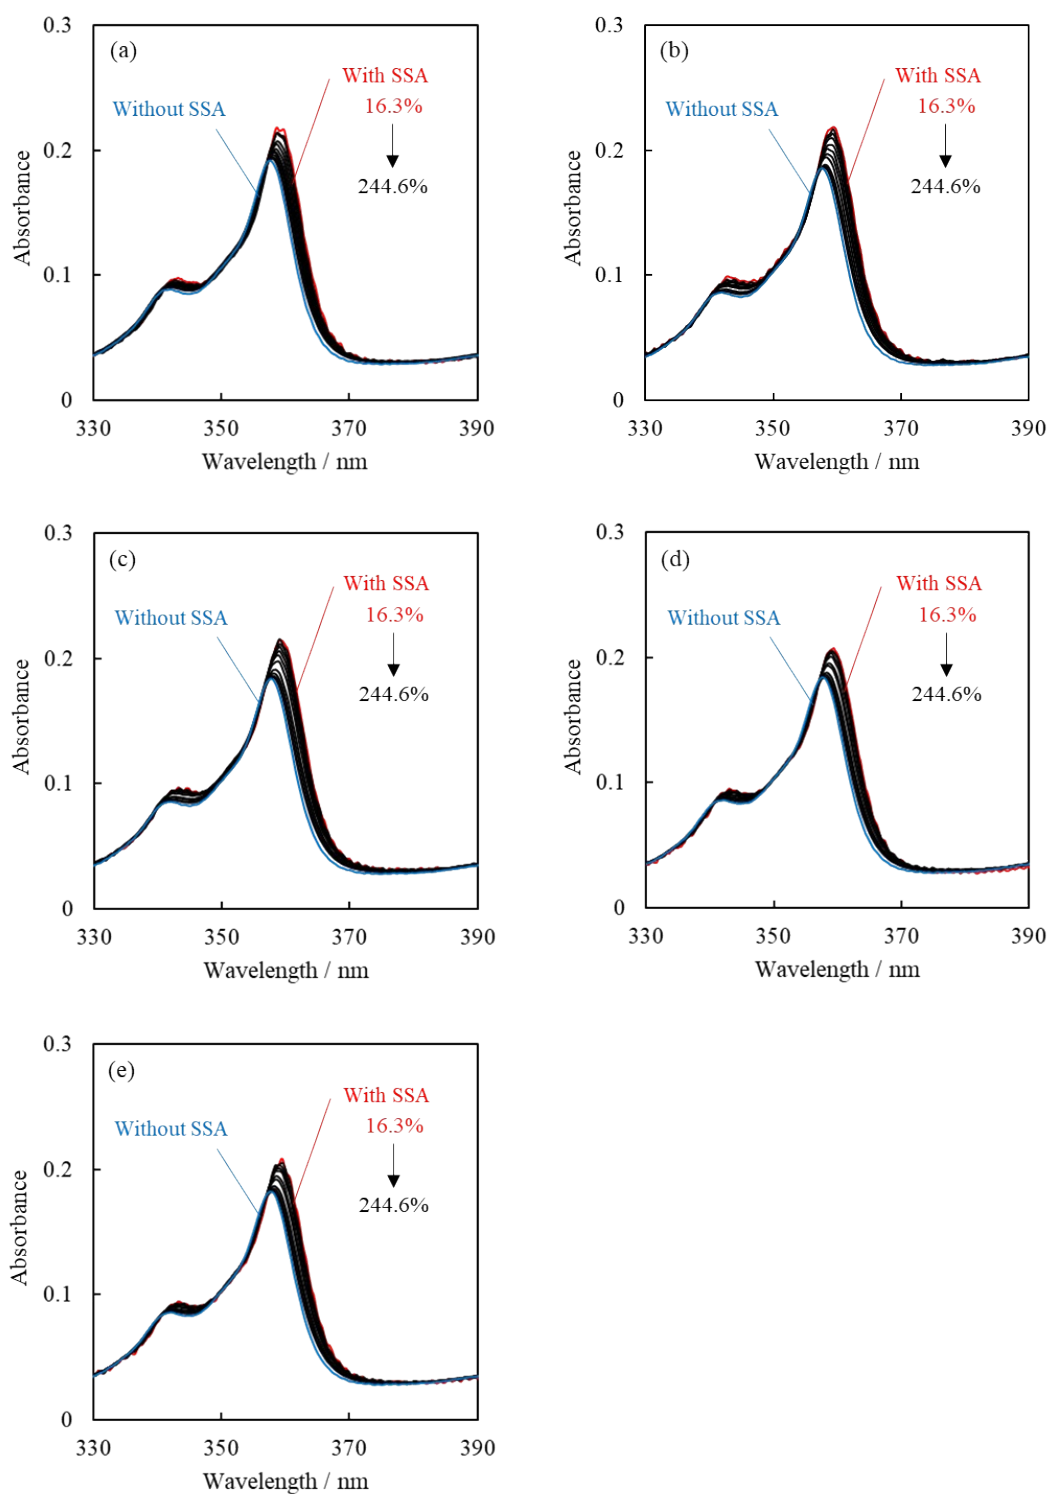

**Figure S8.** UV-vis adsorption spectra of compound 1 (chloride) with SSA and without SSA in water.

The loading levels of compound 1 were 16.3, 24.5, 32.6, 40.8, 48.9, 65.2, 81.5, 122.3, 163.0, 244.6%

vs. CEC: (a)273.15 K, (b)278.15 K, (c)283.15 K, (d)288.15 K, (e)293.15 K.

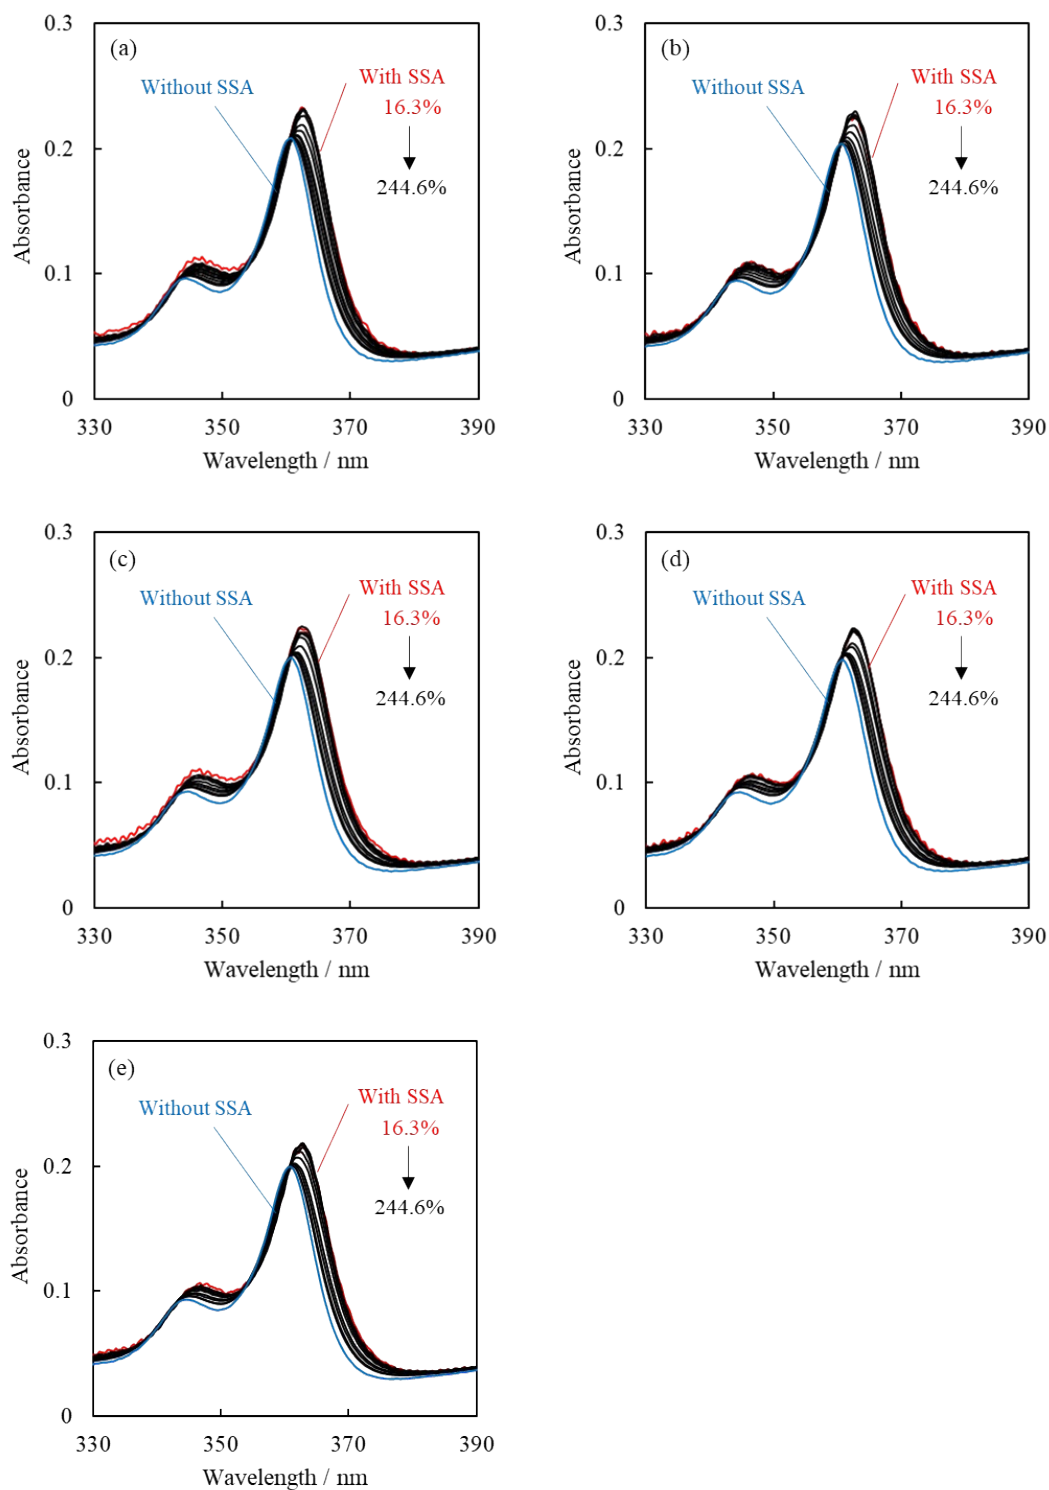

**Figure S9.** UV-vis adsorption spectra of compound 2 (chloride) with SSA and without SSA in water.

The loading levels of compound 1 were 16.3, 24.5, 32.6, 40.8, 48.9, 65.2, 81.5, 122.3, 163.0, 244.6%

vs. CEC: (a)273.15 K, (b)278.15 K, (c)283.15 K, (d)288.15 K, (e)293.15 K.

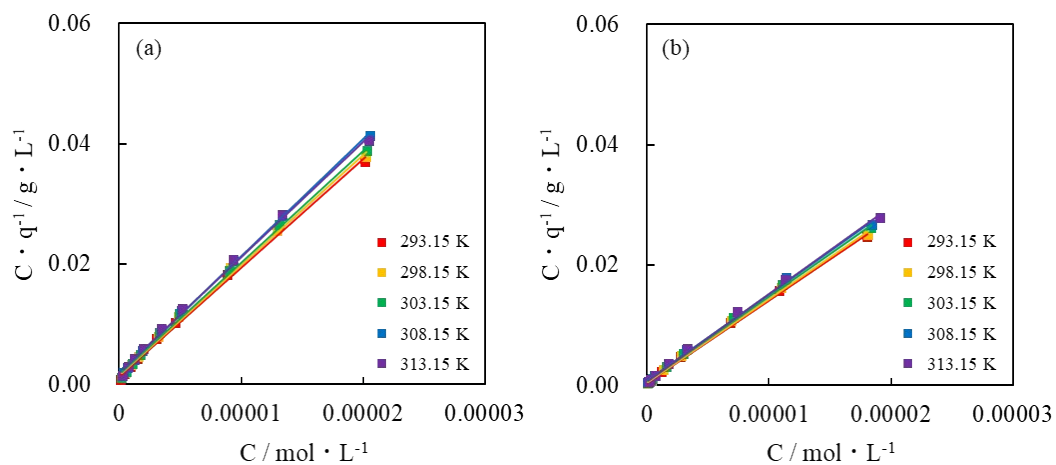

**Figure S10.** Langmuir isotherm analysis for the adsorption of Acridinium derivatives (chloride) on SSA at each temperature: (a) compound 1, (b) compound 2.
